# Supplementary material for: Computational-experimental approach to drug-target interaction mapping: A case study on kinase inhibitors
Source: PLOS journal article supplement (doi:10.1371/journal.pcbi.1005678), 2017-08-07
Supplement: S3 (10.1371/journal.pcbi.1005678.s003) [file journal.pcbi.1005678.s003]

### ***New Drug***

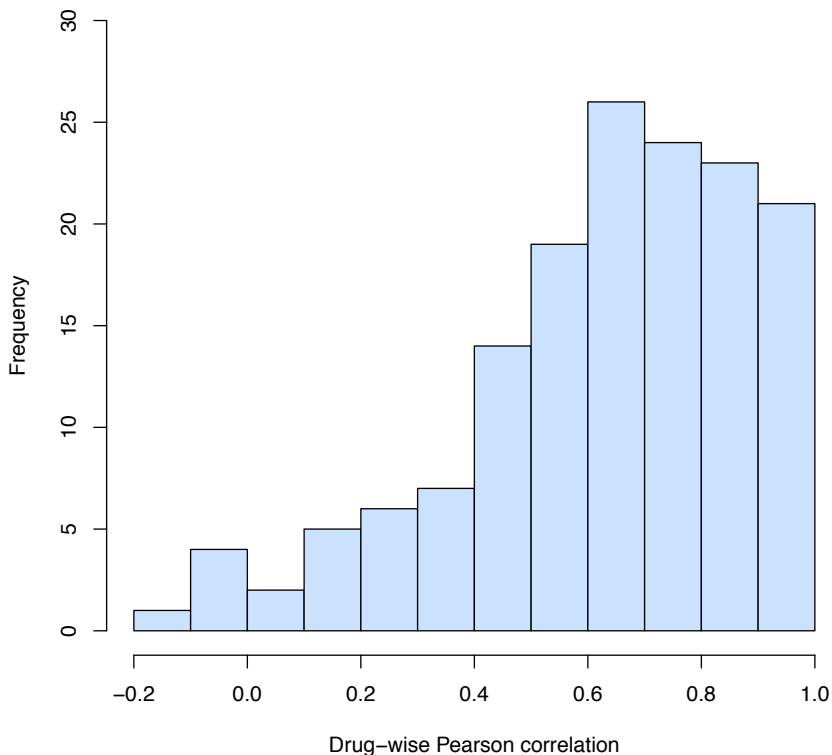

**S3 Fig. Distribution of 152 drug-wise Pearson correlation values between compound-kinase binding affinities ( $\text{pK}_i$ ) measured in the Metz *et al.* study and their model predictions under the *New Drug* scenario.** The predictions were made using KronRLS algorithm with the best pair of drug and protein kernels (KD-sp and KP-GS) under the leave-drug-out cross-validation. 125 out of 152 correlations are statistically significant ( $p < 0.0001$ ), and 58 correlation values are greater than 0.75.
