# Supplementary material for: Computational-experimental approach to drug-target interaction mapping: A case study on kinase inhibitors
Source: PLOS journal article supplement (doi:10.1371/journal.pcbi.1005678), 2017-08-07
Supplement: S5 (10.1371/journal.pcbi.1005678.s005) [file journal.pcbi.1005678.s005]

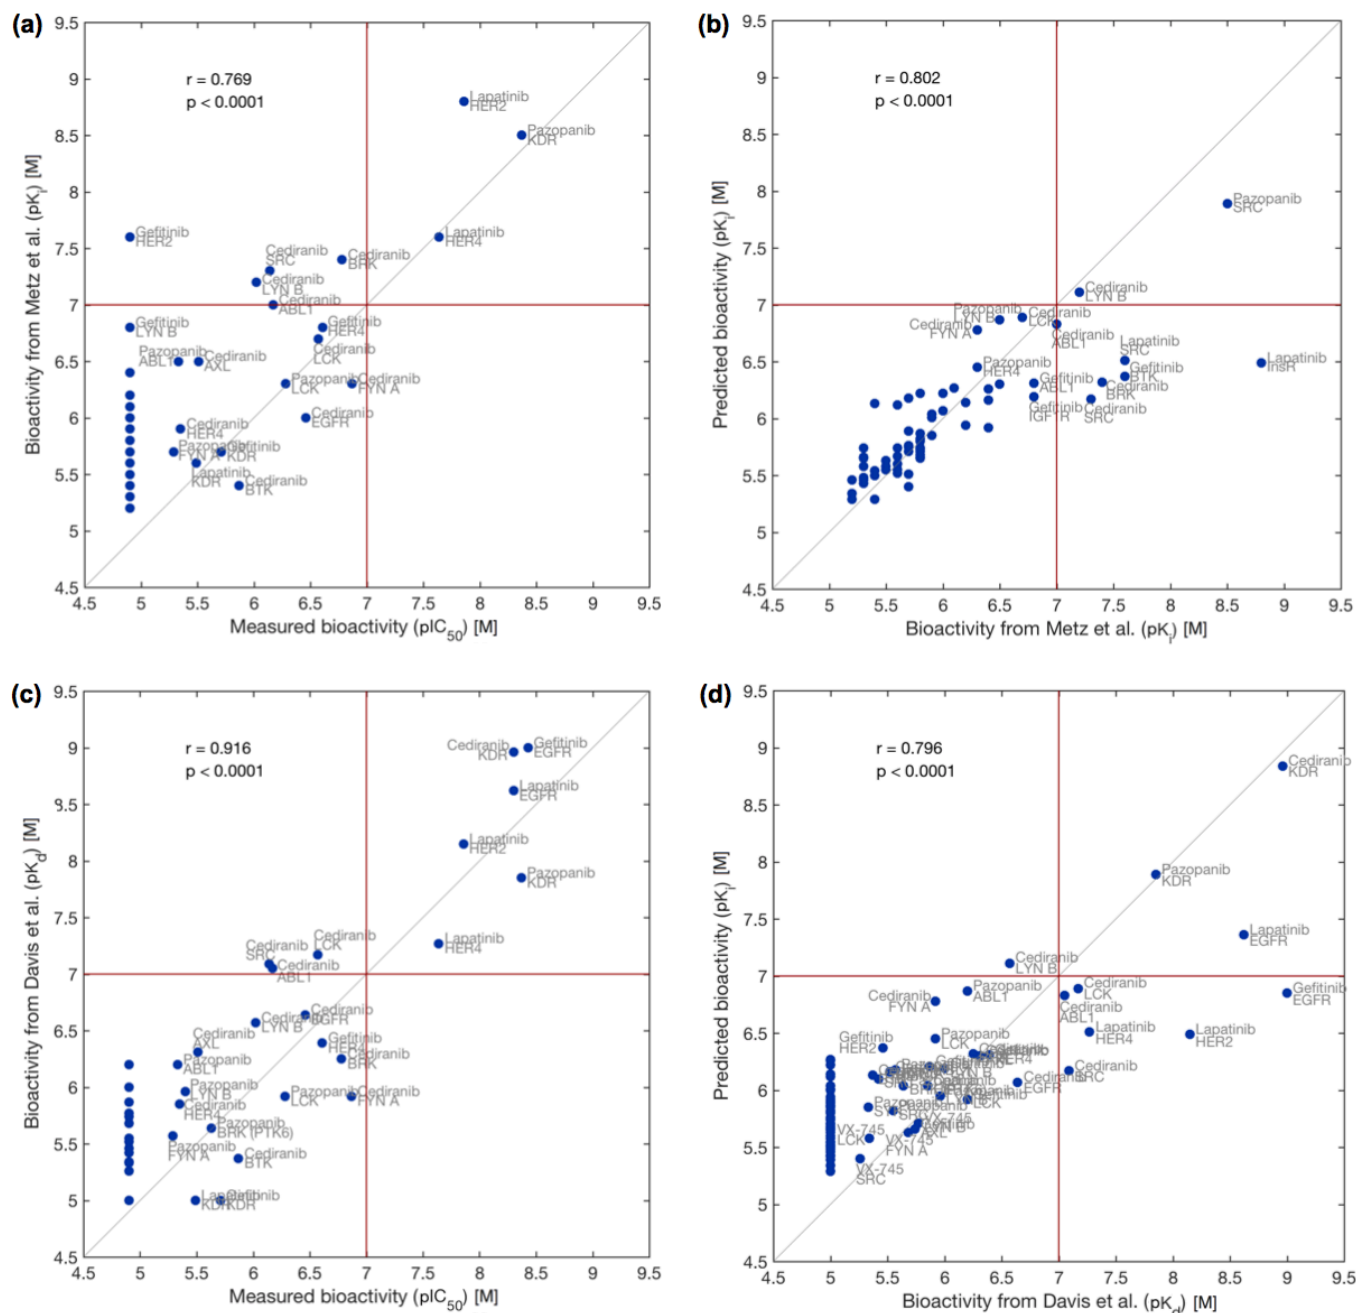

**S5 Fig. The comparison between model-predicted and experimentally-measured in different assays bioactivities of 100 compound-kinase pairs included in our experimental validation. (a,c)** Technical variability between two experimental kinase assays. Scatter plots between (a) 82  $pK_i$  values measured in Metz *et al.* study and  $pIC_{50}$  values from our experimental assay; (c) 95  $pK_d$  values from Davis *et al.* study and  $pIC_{50}$  values from our experimental assay; (b) 73 *in silico*-predicted and measured in Metz *et al.* study  $pK_i$  values, excluding compound-kinase pairs blinded in the model training (marked with orange colour in Fig 4a and S2 Table); (d) 95 *in silico*-predicted  $pK_i$  values and  $pK_d$  readouts from Davis *et al.* study. The values are detailed in S2 Table.
