# Supplementary material for: Computational-experimental approach to drug-target interaction mapping: A case study on kinase inhibitors
Source: PLOS journal article supplement (doi:10.1371/journal.pcbi.1005678), 2017-08-07
Supplement: S7 (10.1371/journal.pcbi.1005678.s007) [file journal.pcbi.1005678.s007]

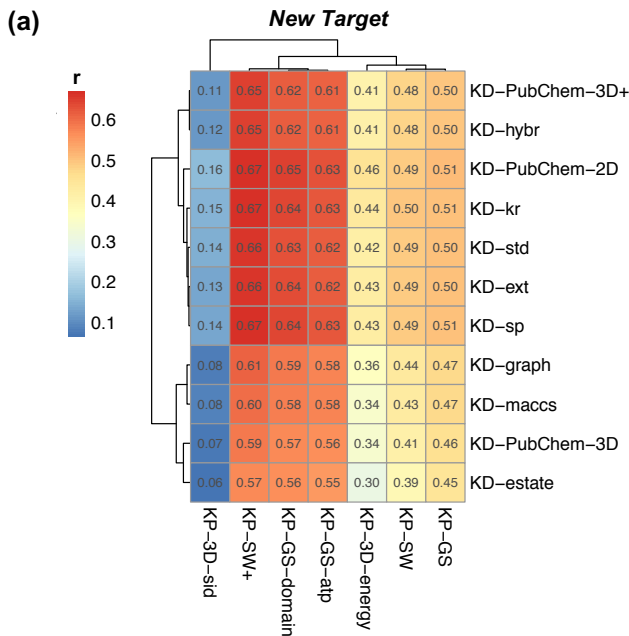

**(b)**

|                 | Abbreviation   | Description                                                                                                                                            |                                  |
|-----------------|----------------|--------------------------------------------------------------------------------------------------------------------------------------------------------|----------------------------------|
| Drug compounds  | KD-PubChem-2D  | 881-bit fingerprint based on 2D substructures defined by PubChem                                                                                       | Fingerprint-based linear kernels |
|                 | KD-PubChem-3D  | PubChem's descriptor based on up to 10 calculated 3D conformers                                                                                        |                                  |
|                 | KD-PubChem-3D+ | PubChem's descriptor based on up to 10 calculated 3D conformers, additionally including information on acceptor count, hydrophobe count and ring count |                                  |
|                 | KD-estate      | 79-bit fingerprint corresponding to EState substructures                                                                                               |                                  |
|                 | KD-ext         | 1024-bit path-based, hashed fingerprint taking into account ring systems                                                                               |                                  |
|                 | KD-graph       | 1024-bit path-based, hashed fingerprint considering connectivity                                                                                       |                                  |
|                 | KD-hybr        | 1024-bit path-based, hashed fingerprint considering hybridization states                                                                               |                                  |
|                 | KD-kr          | 4860-bit fingerprint defined by Klekota and Roth                                                                                                       |                                  |
|                 | KD-maccs       | 166-bit fingerprint based on MACCS structural keys                                                                                                     |                                  |
|                 | KD-sp          | 1024-bit fingerprint based on the shortest paths between pairs of atoms taking into account ring systems and charges                                   |                                  |
|                 | KD-std         | 1024-bit path-based, hashed fingerprint                                                                                                                |                                  |
| Protein targets | KP-SW          | Amino acid sequence-based linear kernel                                                                                                                |                                  |
|                 | KP-SW+         | Amino acid sequence and extended target profile-based linear kernel                                                                                    |                                  |
|                 | KP-3D-energy   | Protein structure-based linear kernel (using absolute value of the energy needed to align proteins)                                                    |                                  |
|                 | KP-3D-sid      | Protein structure-based linear kernel (using sequence identity)                                                                                        |                                  |
|                 | KP-GS          | Generic String kernel applied to full protein sequences                                                                                                |                                  |
|                 | KP-GS-domain   | Generic String kernel applied to kinase domain sequences                                                                                               |                                  |
|                 | KP-GS-atp      | Generic String kernel applied to ATP binding pocket sequences                                                                                          |                                  |

**S7 Fig. (a) Leave-target-out cross-validation results.** The prediction accuracy was evaluated with Pearson correlation ( $r$ ) between binding affinities ( $pK_i$ ) from the study by Metz *et al.* and those predicted using KronRLS algorithm with different pairs of drug (rows) and protein (columns) molecular descriptors encoded as kernel matrices **(b)**.
